# Supplementary material
Source: publisher figshare collection journal article supplement (https://acs.figshare.com/ndownloader/files/25587288)
Supplement: Supplementary file 1 [file 25587288]

## Supplementary information

# Bulk Metallic Glasses' Response to Oscillatory Stress is Governed by the Topography of the Energy Landscape

*Longwen Tang<sup>1, 2</sup>, Gang Ma<sup>1</sup>, Han Liu<sup>2</sup>, Wei Zhou<sup>1\*</sup>, Mathieu Bauchy<sup>2\*</sup>*

<sup>1</sup> State Key Laboratory of Water Resources and Hydropower Engineering Science, Wuhan University, Wuhan 430072, China.

<sup>2</sup> Physics of Amorphous and Inorganic Solids Laboratory (PARISlab), Department of Civil and Environmental Engineering, University of California, Los Angeles, California 90095, USA.

## Corresponding Author

\*Wei Zhou (Email: [zw\\_mxx@whu.edu.cn](mailto:zw_mxx@whu.edu.cn))

\*Mathieu Bauchy (Email: [bauchy@ucla.edu](mailto:bauchy@ucla.edu))

## Contents:

**Figure S1.** Incremental residual strain as the function of cycle number

**Figure S2.** Potential energy of the glasses as a function of the number of cycles.

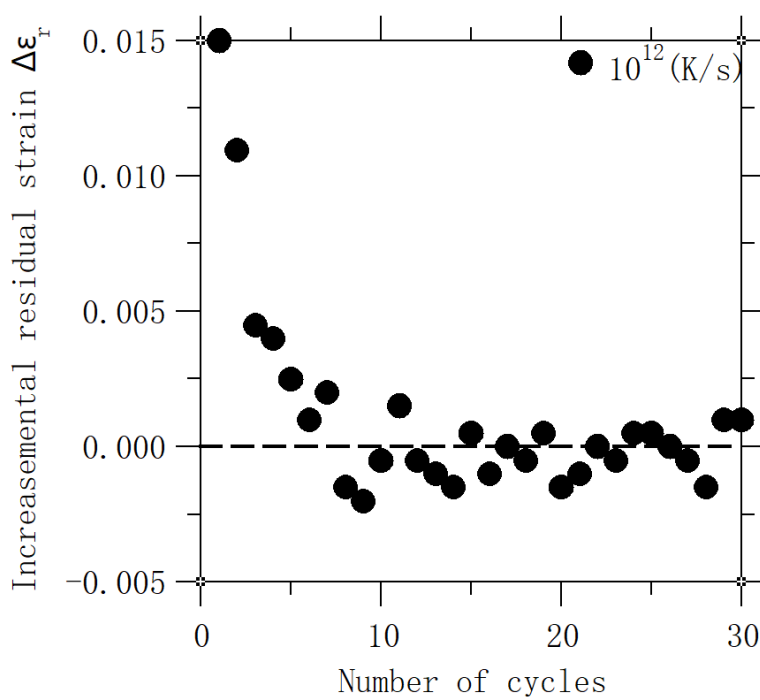

**Figure S1.** Incremental residual strain as the function of cycle number for a glass prepared with high cooling rate ( $10^{12}$  K/s).

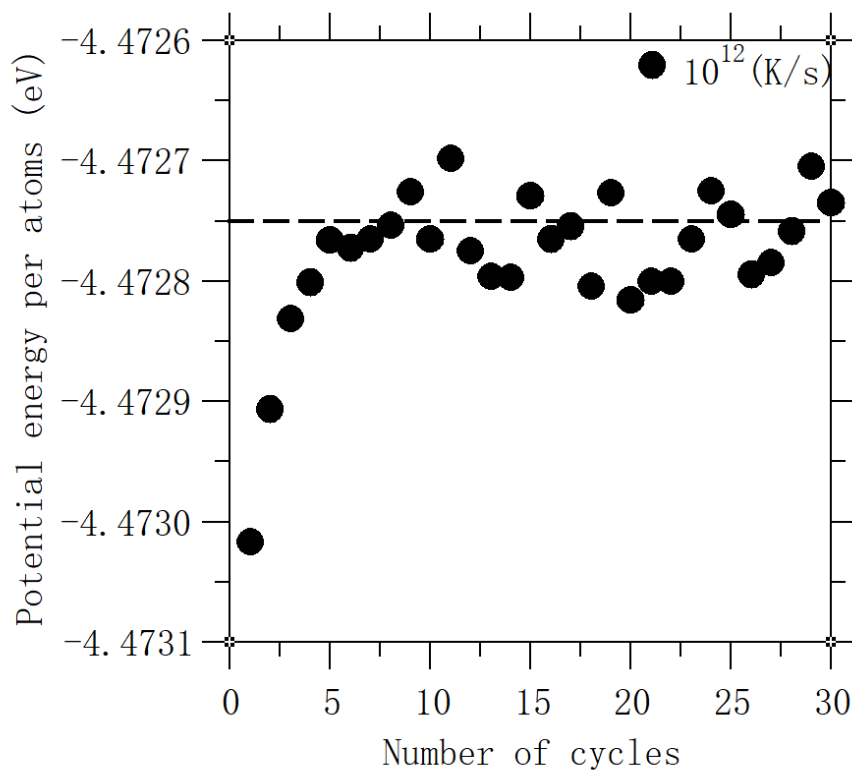

**Figure S2.** Potential energy of the glasses as a function of the number of cycles.
